# Supplementary material
Source: PubMed Central journal article supplement (PMC4263171)
Supplement: ncomms6548-s1.pdf [file ncomms6548-s1.pdf]

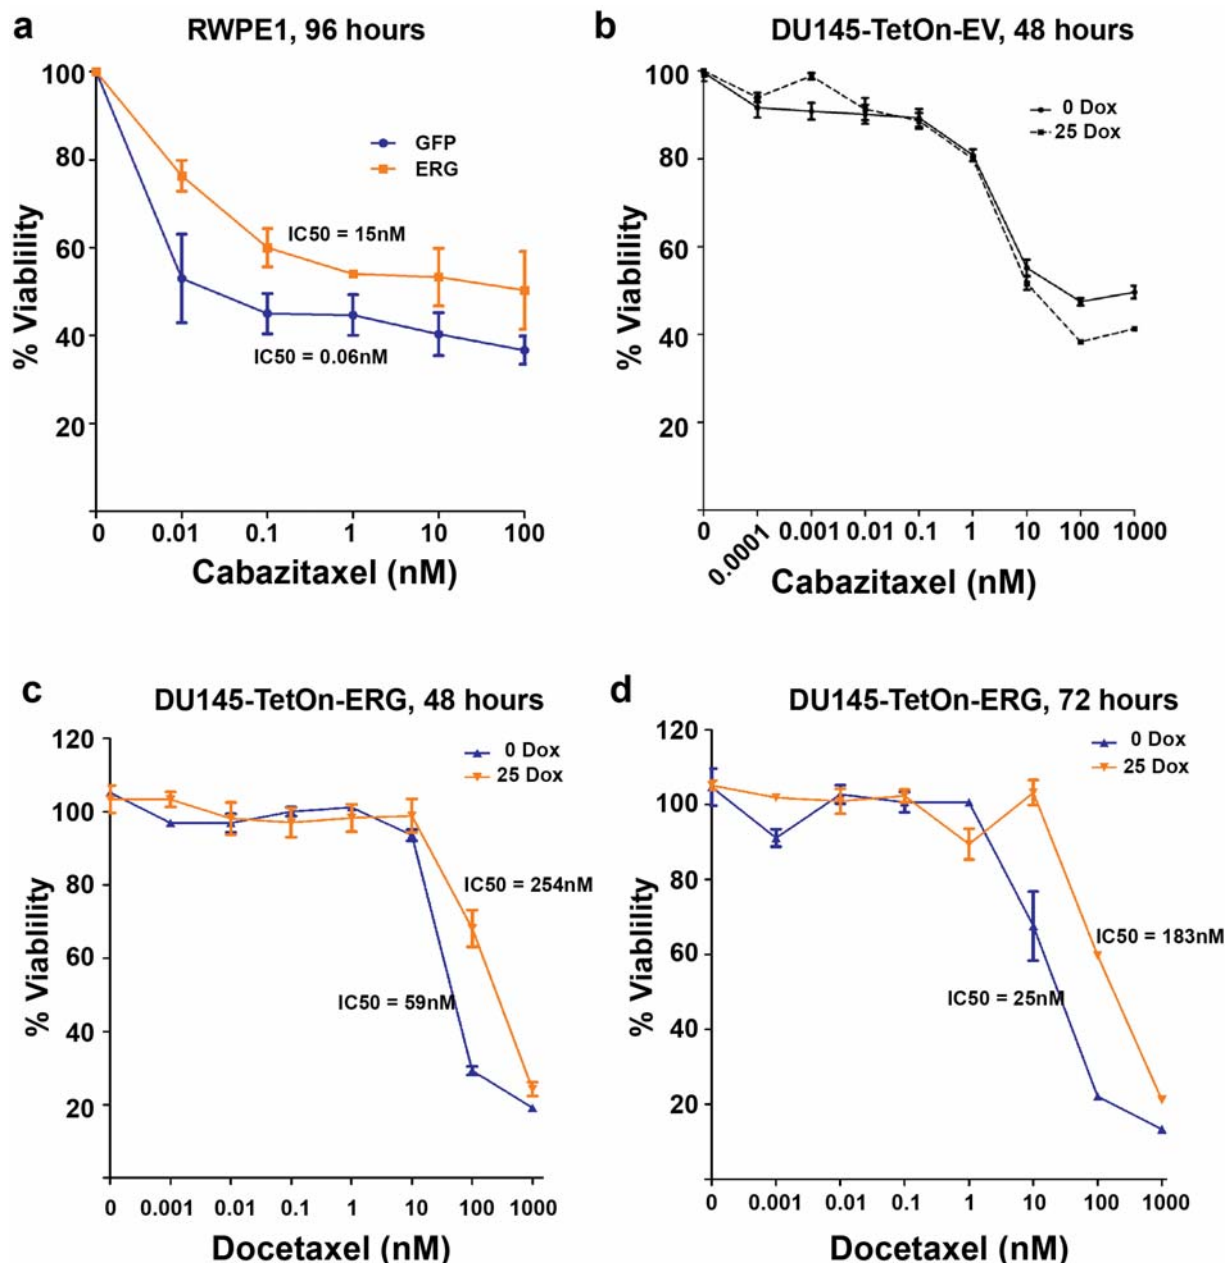

**Supplementary Figure 1.** Cytotoxicity assays of RWPE1 clones stably over-expressing ERG (orange) or GFP (blue) (A<sup>1</sup>) or DU145-TetOn-empty vector (EV) following 96 or 48 hr of cabazitaxel treatment, respectively. Inset, ERG immunoblot in Du145-ERG clones stably expressing ERG-targeting shRNA. Tubulin was used as loading control (B, there is no inset for RWPE1) (D) Apoptosis induction (caspase 3/7 activity) 24 hours following cabazitaxel treatment of DU145 cells stably expressing GFP (blue) or ERG (orange). Values are normalized to vehicle-treated cells. (E) Cabazitaxel anti-proliferative activity in DU145 with inducible ERG expression (Tet-ON-ERG). Cell viability results were obtained from a 48 hr treatment with cabazitaxel following a 2 day-exposure to the indicated doses of doxycycline (Dox) Inset: immunoblot showing ERG protein expression in response to increasing doses of Dox. Cells with endogenous (VCaP) or stable ERG overexpression (Du-ERG) are shown as controls. (F). Docetaxel antiproliferative activity following 72 hr of drug treatment in DU145-TetOn-ERG cells versus control DU145-TetOn-EV cells.

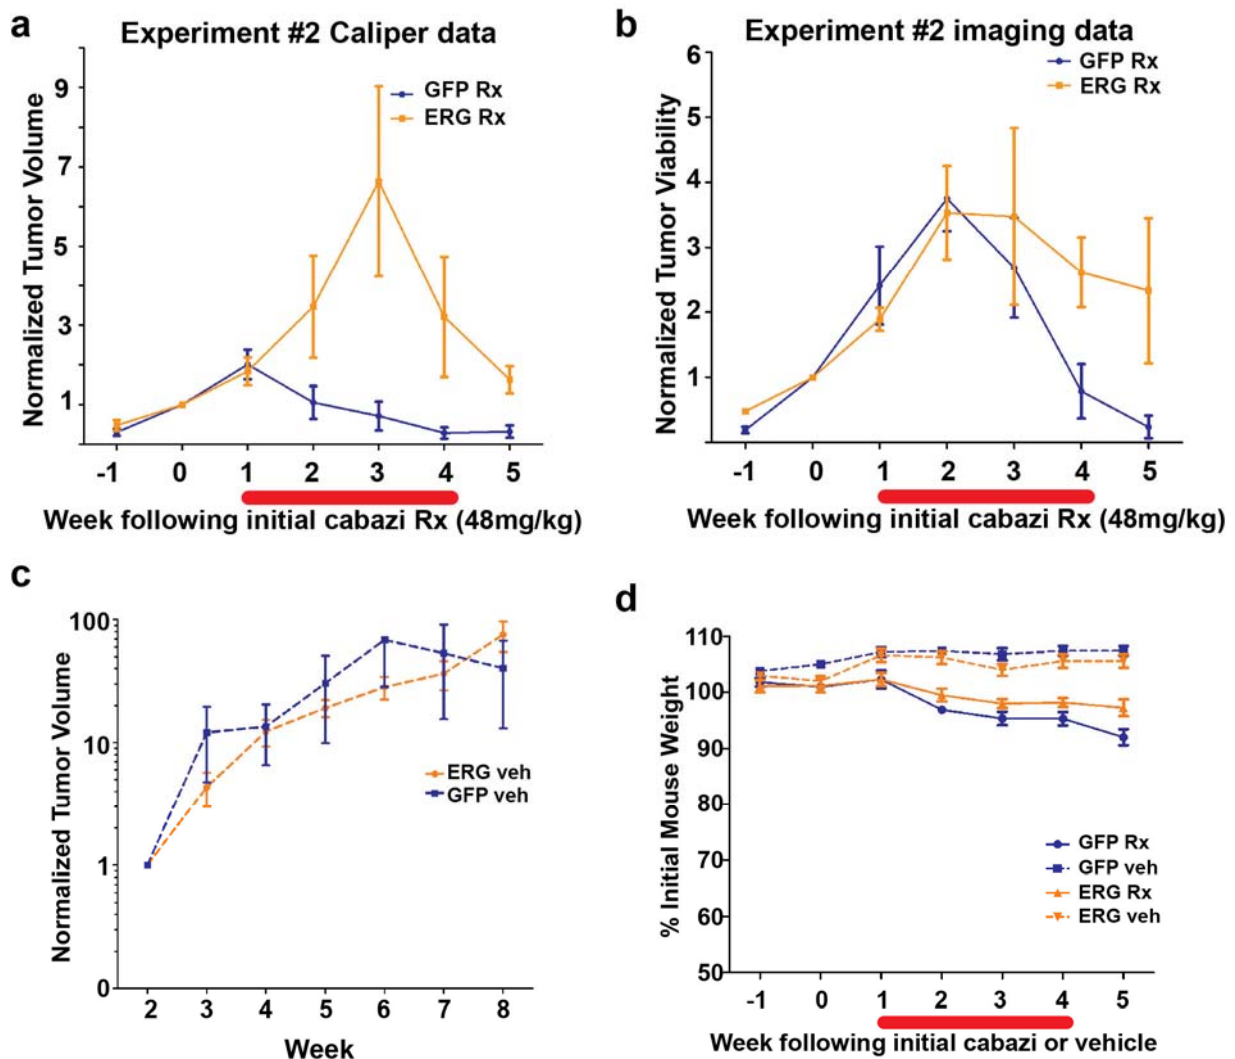

**Supplementary Figure 2.** Mouse weight (**B**) or tumor assessment (**C-E**) from DU145-ERG (orange) or DU145-GFP (blue) tumor xenograft volume assessment (average +/- error) before, during and after treatment with 48mg/kg cabazitaxel (solid lines) or vehicle (dashed lines) at the indicated week following cell subcutaneous injection (n = 5 mice/group). **C, left.**

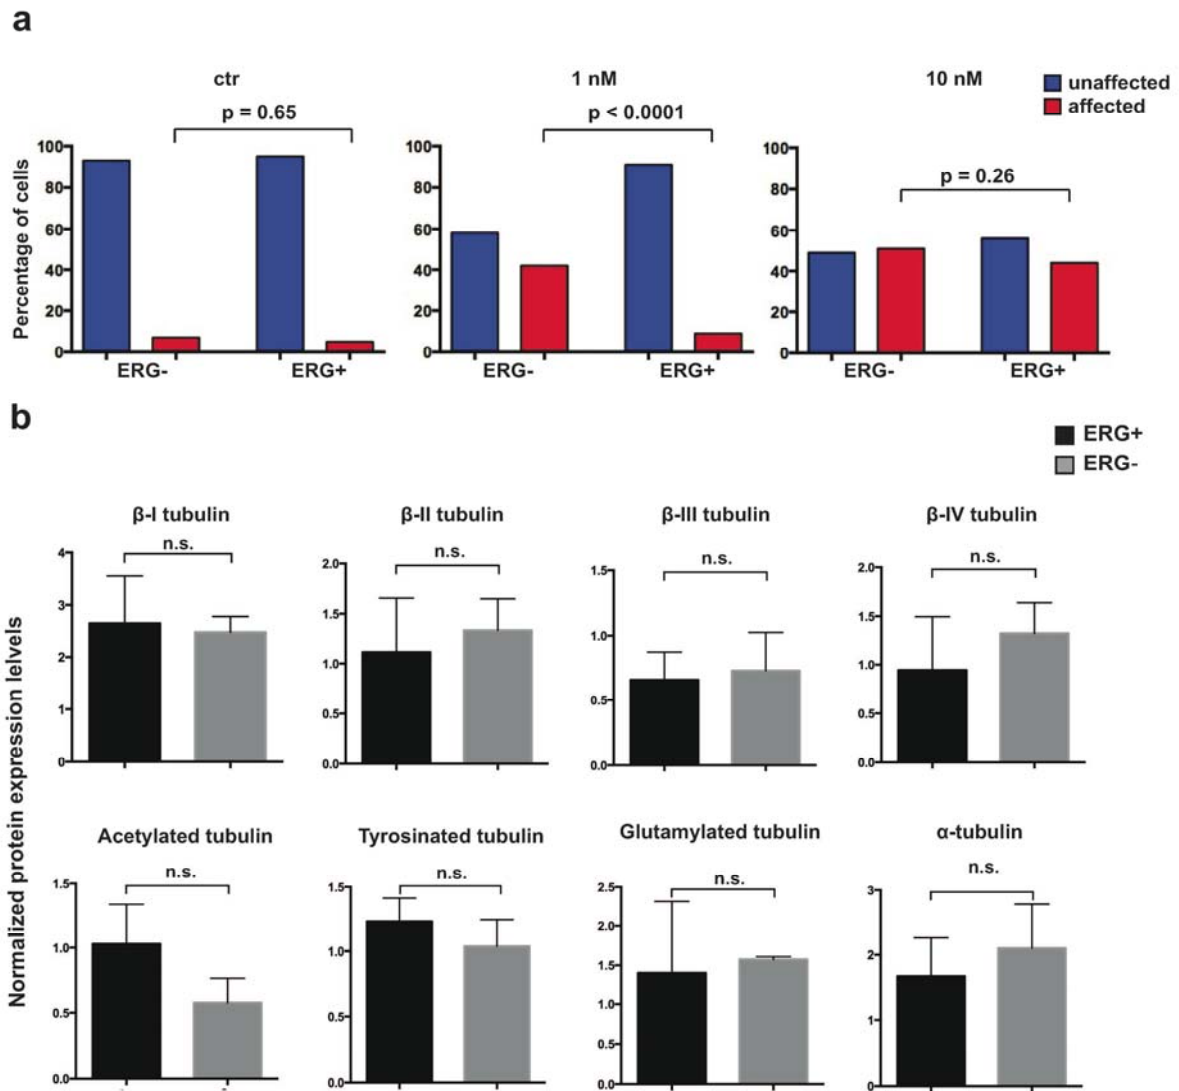

**Supplementary Figure 3.** (a) Quantification of immunofluorescence drug target engagement in ERG-positive and ERG-negative DU145 cells. Cell percentage and p values calculated from Fischer exact tests are shown graphically for each condition. Cells arrested in mitosis or with visible MT bundling are considered cabazitaxel affected and thus grouped together (red bars), unaffected cells are depicted in blue bars. (b) Quantification of tubulin isotypes and post-translational modification expression levels in ERG-positive (black bars) and ERG-negative (grey bars) DU145 cells. Densitometry was performed with Image J software (National Institute of Health, Bethesda, MD, USA) and data were analyzed using Graphpad software. SD showed as error bars. Statistical significance was determined using t-test provided by GraphPad software.

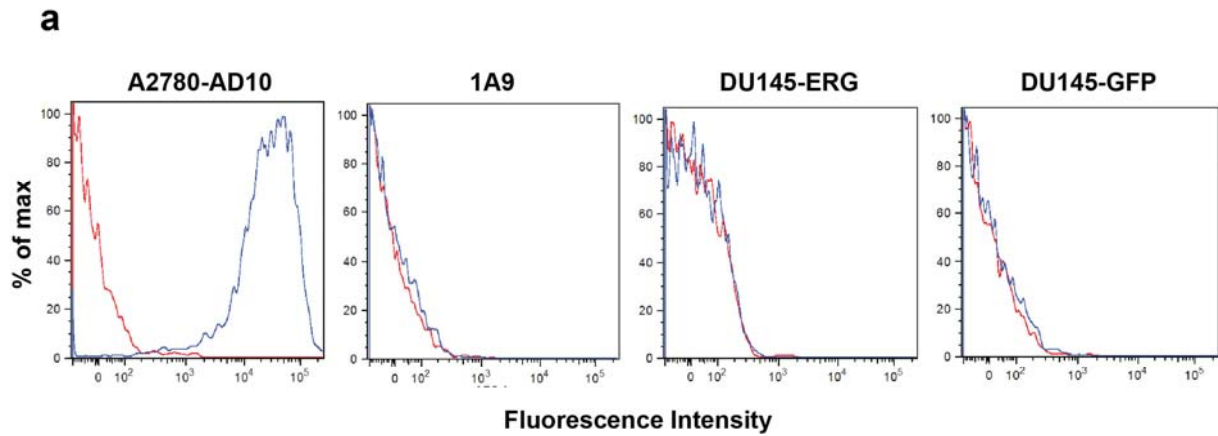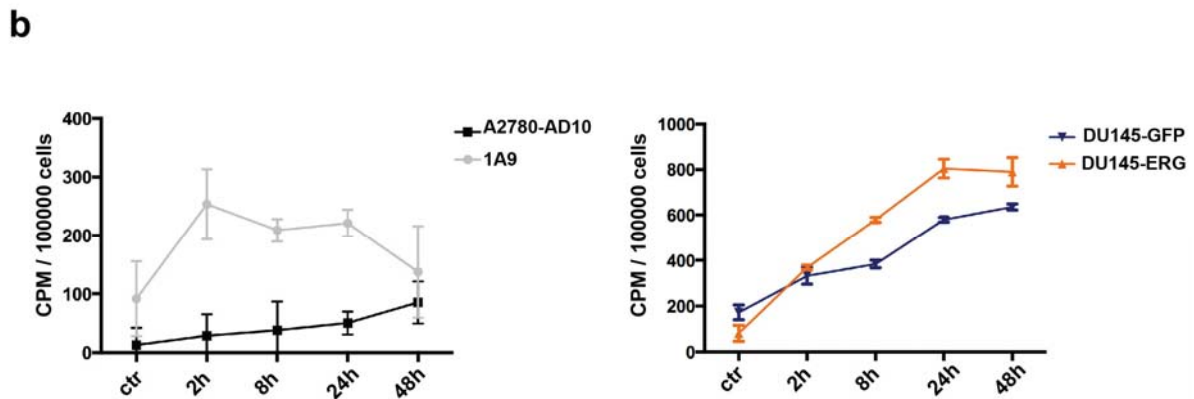

**Supplementary Figure 4. Evaluation of the MDR phenotype in ERG-positive and ERG-negative DU145 cells. (a)** Assessment of protein expression levels of P-glycoprotein (P-gp) in DU145-ERG and DU145-GFP cells by flow cytometry. Ovarian cancer cell lines 1A9 and the isogenic P-gp over-expressing cell line A2780-AD10 were used as negative and positive control for P-gp protein expression, respectively. P-gp protein expression levels in ERG-positive cells are similar to background levels and to the levels detected for the isogenic ERG-negative cell line. Blue: P-gp; red: IgG isotype control. **(b)** Intracellular drug accumulation assay using C-14 radiolabeled cabazitaxel in DU145-ERG and DU145-GFP cells. Intracellular levels of the radiolabeled drug in DU145-ERG are equivalent (2h time point) or even superior (8-48h time points) to the values documented for the DU145-GFP cells.

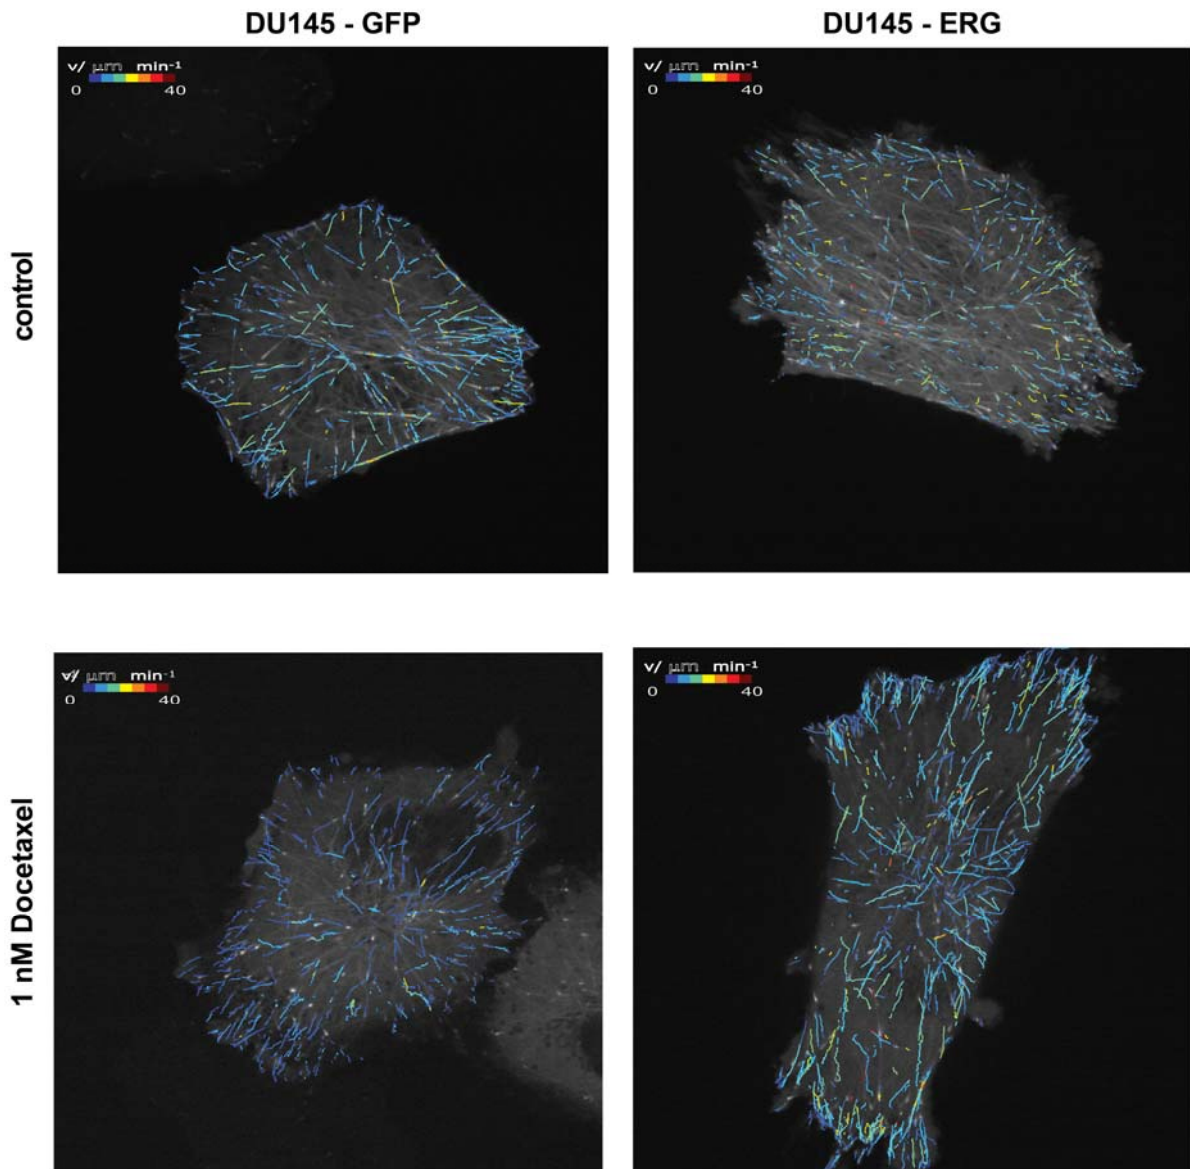

**Supplementary Figure 5. (a)** Representative images of DU145 ERG- and ERG+ cells infected with EB1-EGFP. The bright comets are clusters of EB1 dimers that bind the tips of MTs during growth. MT growth tracks are for DU145-ERG or DU145-GFP cells in the presence of 1nM docetaxel or vehicle are shown. Color-coded computer-vision tracking of MT dynamics shows speed of MT growth with warmer colors indicating high speed rates and colder colors indicating low speed rates. Inset shows corresponding EB1 comet velocity histograms of the number of tracks per micron/minute speed.

**a**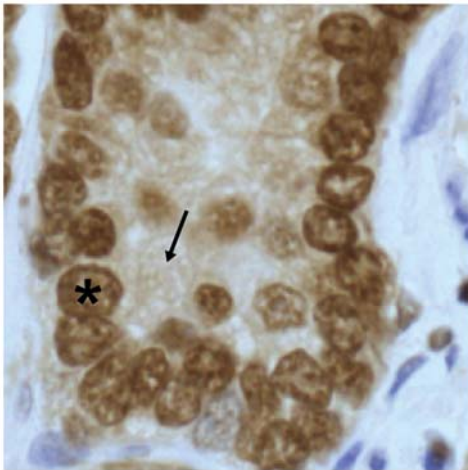**b**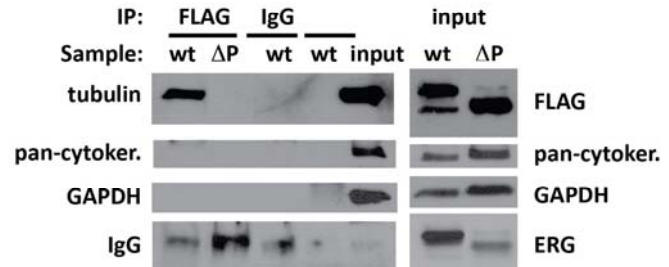

**Supplementary Figure 6. (a)** ERG immunohistochemistry images from of a tissue microarray with locally advance prostate cancer specimens. The top 2 images correspond to tissue from 2 different patients that were characterized with ERG rearrangements and that are positive for high levels of ERG protein levels. Boxes indicate the area that is shown at higher magnification below. To the right is an example of ERG presence in the nucleus (\*) and in the cytoplasm (arrow). To the left is an example of weak to little ERG cytoplasmic localization with strong nuclear localization. **(b)** Co-immunoprecipitation (IP) of whole cell extracts from DU145-GFP 72 hours following transient transfection with the indicated Flag-tagged wild type or pointed domain deletion ( $\Delta$ P) ERG constructs anti-Flag or anti  $\alpha$ -tubulin antibody followed by immunoblot for the indicated proteins. Isotype-matched IgGs were used to control for non-specific binding to the beads used for immunoprecipitation. Equal amounts of input lysate were also immunoblotted in the same fashion and shown to the left of the IP blot. Western blot images have been cropped for presentation. Full size images are presented in supplementary **Fig. S11**.

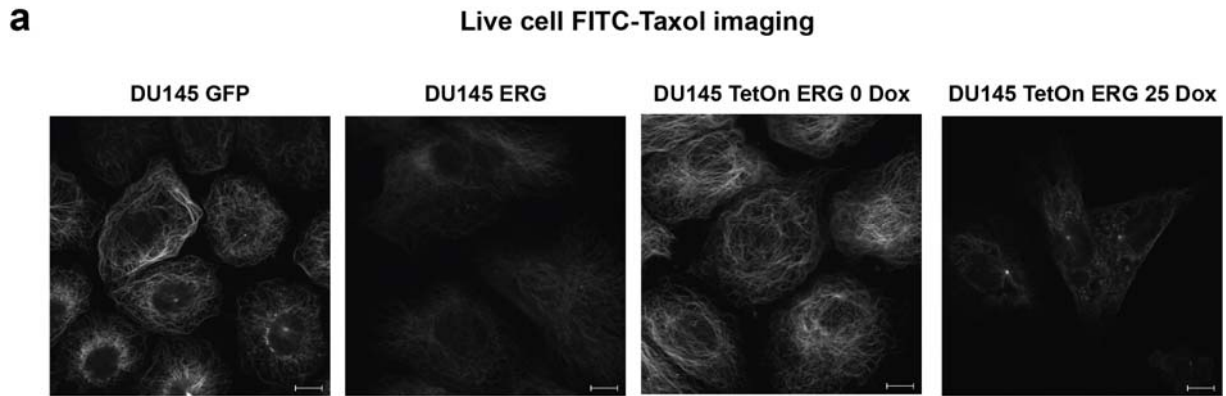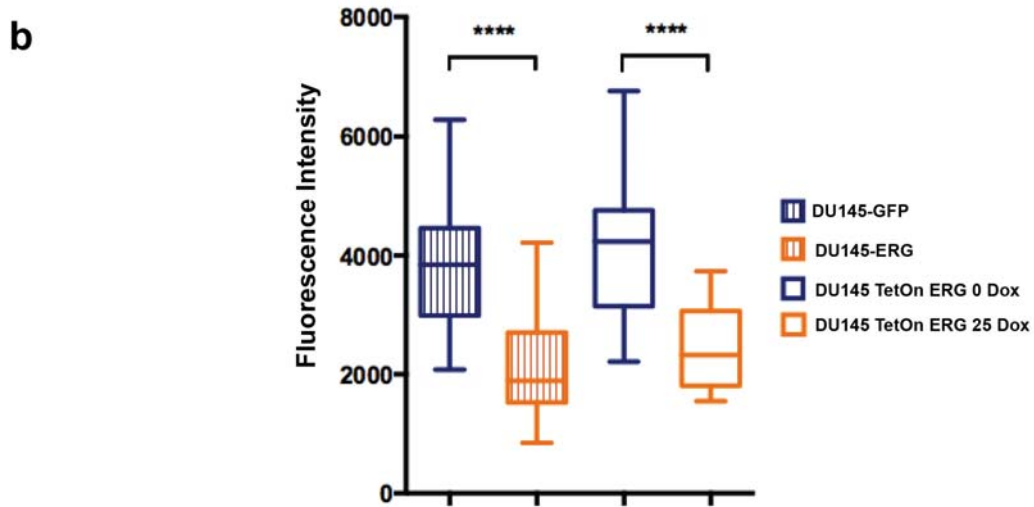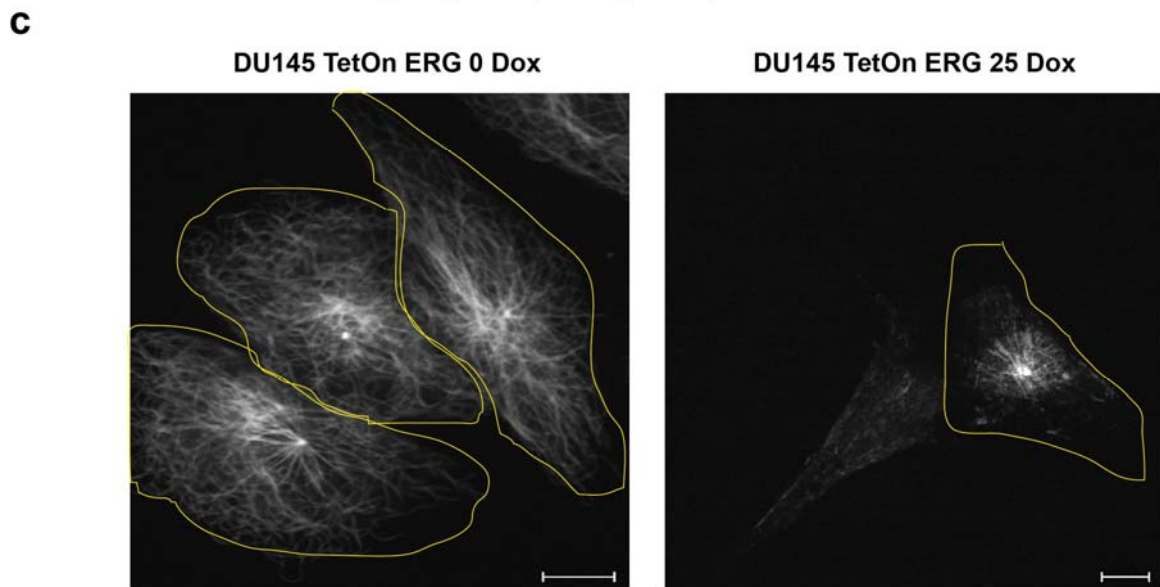

**Supplementary Figure 7.** Live cell FITC-Taxol imaging. (a) Microtubule network decoration using fluorescently labeled paclitaxel-induced decoration in ERG-negative (DU145 TetOn ERG doxycycline 0 and DU145-GFP) and ERG-positive (DU145 TetOn ERG doxycycline 25 and DU145-ERG) cells. Live cells were permeabilized with 0.5% Triton X-100 and treated with 1

$\mu$ M FITC-labeled paclitaxel for 5 minutes. Images of live cells were subsequently acquired with confocal microscope (63x/1.4NA objective, Zeiss, Germany). Representative images are shown for each condition. Scale bar: 10  $\mu$ M. **(b)** Quantification of fluorescence intensity of S7a; fluorescence intensity of an average of 30 cells per condition was done using MetaMorph image analysis software (Molecular Device, CA, USA). Data were analyzed using Graphpad software. Statistical significance was determined using t-test provided by GraphPad software. **(c)** Schematic representation of cell edges is presented to show the difference in microtubule network extension in ERG-positive and ERG negative DU145 cell. Representative images of both cell lines are shown. Scale bar: 10  $\mu$ m.



**a**

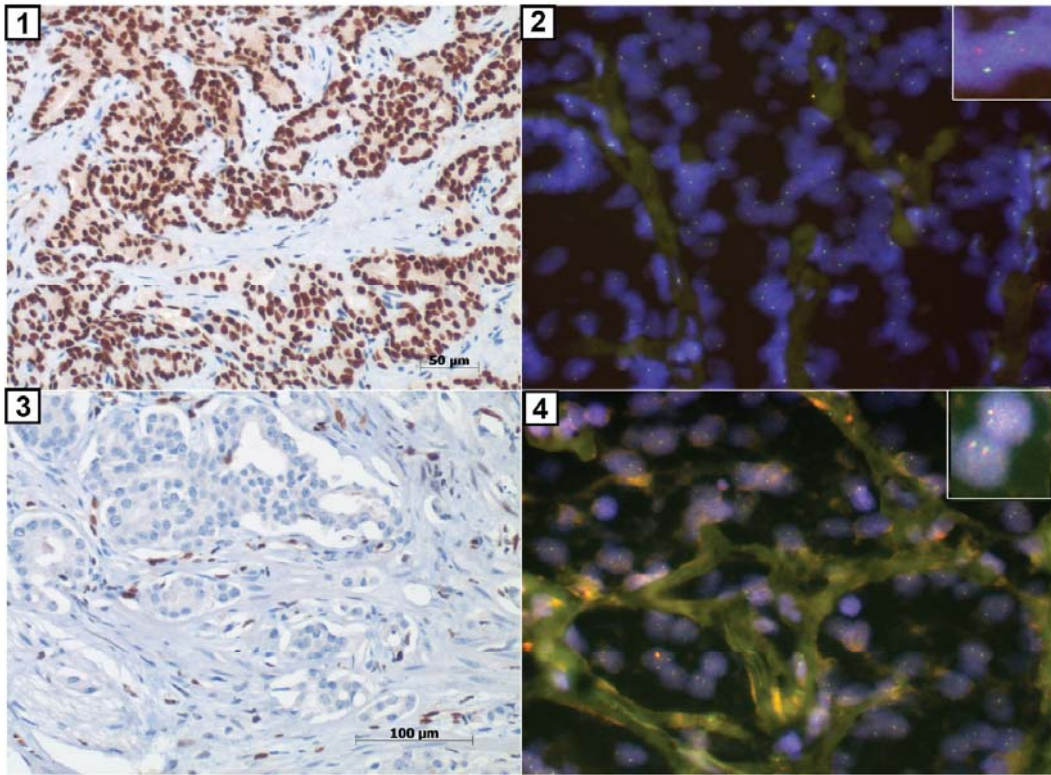

**b**

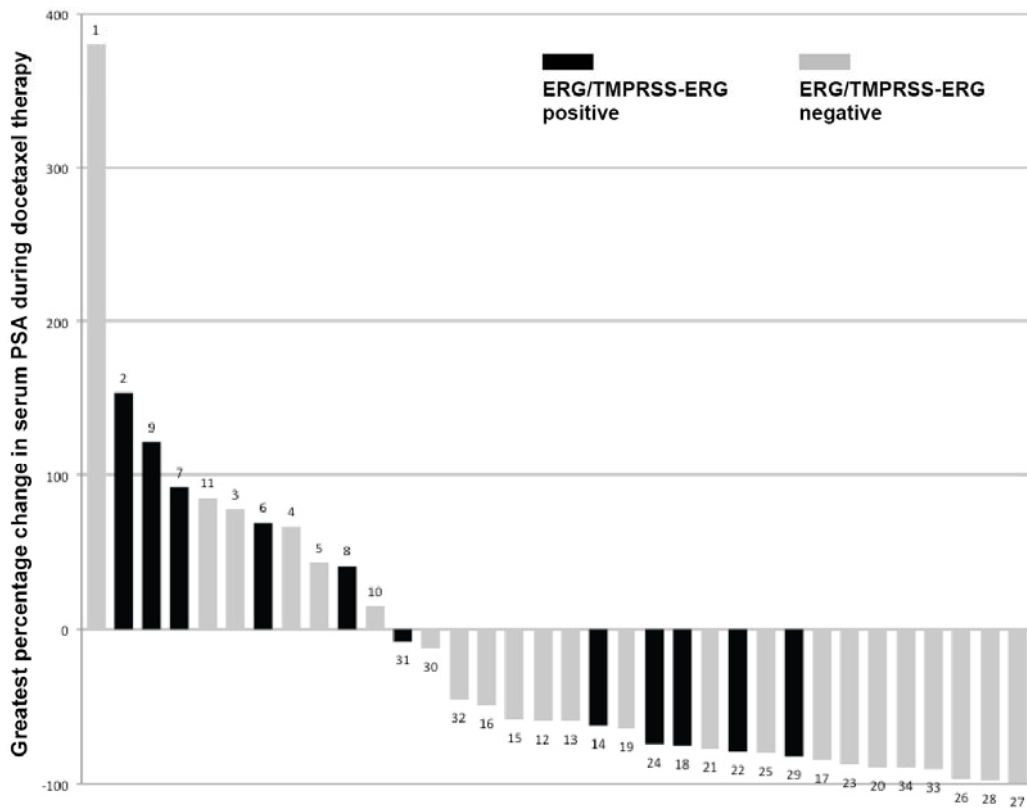

**Supplementary Figure 8.** Expression of TMPRSS-ERG translocation and ERG protein in primary prostate cancer tissues from men later treated with docetaxel for metastatic castrate-resistant disease. Case 9, transrectal biopsy: (a) Positive staining (>95% of cancer cells) for ERG by immunohistochemistry (x200) and (b) positive FISH for TMPRSS-ERG translocation (x400), inset higher magnification of break apart probe. Case 5, radical prostatectomy: (c) Negative staining for ERG by immunohistochemistry (x200) and (d) negative FISH for TMPRSS-ERG translocation (x400), inset higher magnification of break apart probe. Waterfall plot of the greatest percentage change in serum PSA from baseline to end of docetaxel chemotherapy in men with metastatic castrate resistant prostate cancer. The cases in black represent men whose primary prostate cancer tissue was ERG/TMPRSS-ERG positive.

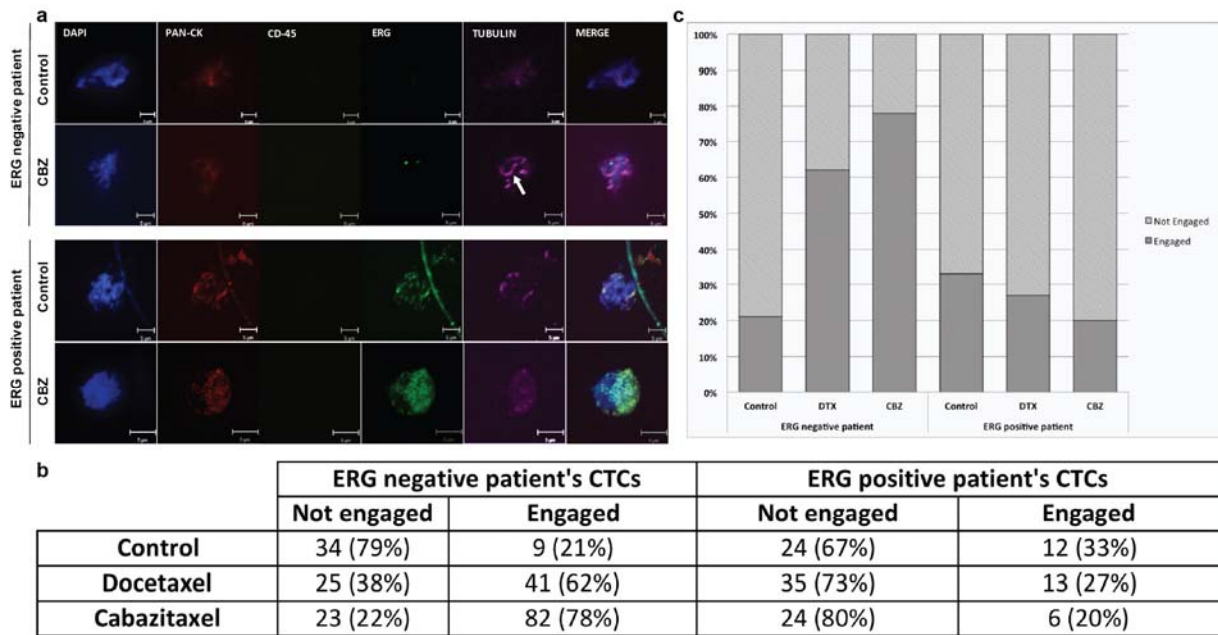

**Supplementary Figure 9.** (a) Analysis of CTCs isolated from the peripheral blood of ERG negative and positive CRPC patients. One ml of peripheral blood from each patient was flown through each GEDI microfluidic device, and the captured CTCs were treated on the device with either DMSO (Control), Docetaxel 100 nM (DTX) or Cabazitaxel 10 nM (CBZ) overnight. GEDI-captured cells were fixed, immunostained with the indicated antigens and imaged by confocal microscopy. CTCs were identified as nucleated, CD45-/pan-CK+ cells, enumerated manually and the microtubule network pattern was assessed for the presence of drug-target engagement. ERG immunostaining is used to confirm ERG expression or lack of expression on the captured CTCs. Representative images of isolated CTCs are shown in untreated or CBZ-treated devices. Microtubule bundles (arrow) are evident in the ERG negative CRPC patient CTCs after CBZ exposure. Scale bar: 5  $\mu$ m. (b) Percentage of CTCs with effective DTE is identified as “engaged” CTC calculated according to the following formula: (engaged CTCs/ not engaged CTCs + engaged CTCs) x 100. (c) Graphic representation of data shown in b.

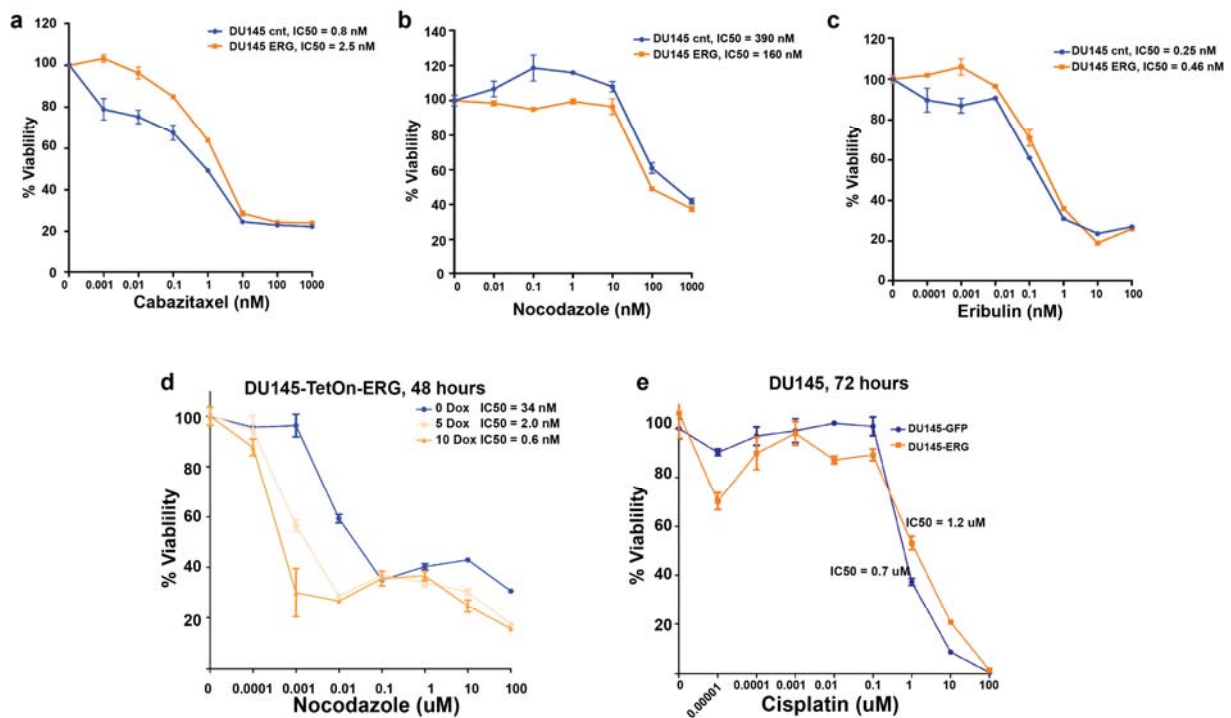

**Supplementary Figure 10.** Cytotoxicity assays of DU145 clones stably over-expressing ERG (orange) or GFP (blue), following treatment with cabazitaxel (**a**), Nocodazole (**b**), Eribulin (**c**) or Cisplatin (**e**). Cytotoxicity assay of DU145-TetOn-ERG cells with the indicated dose of doxycycline following Nocodazole treatment (**d**).

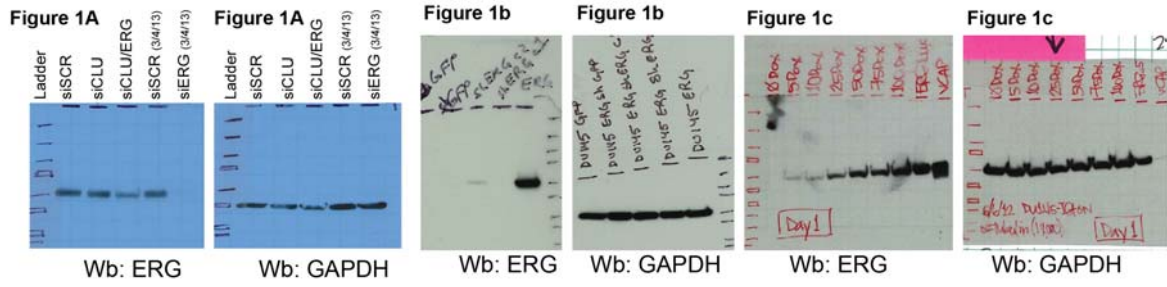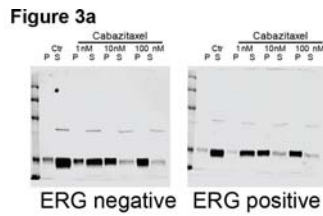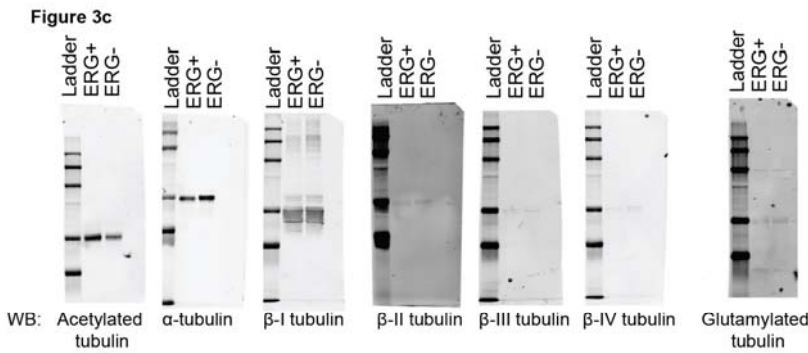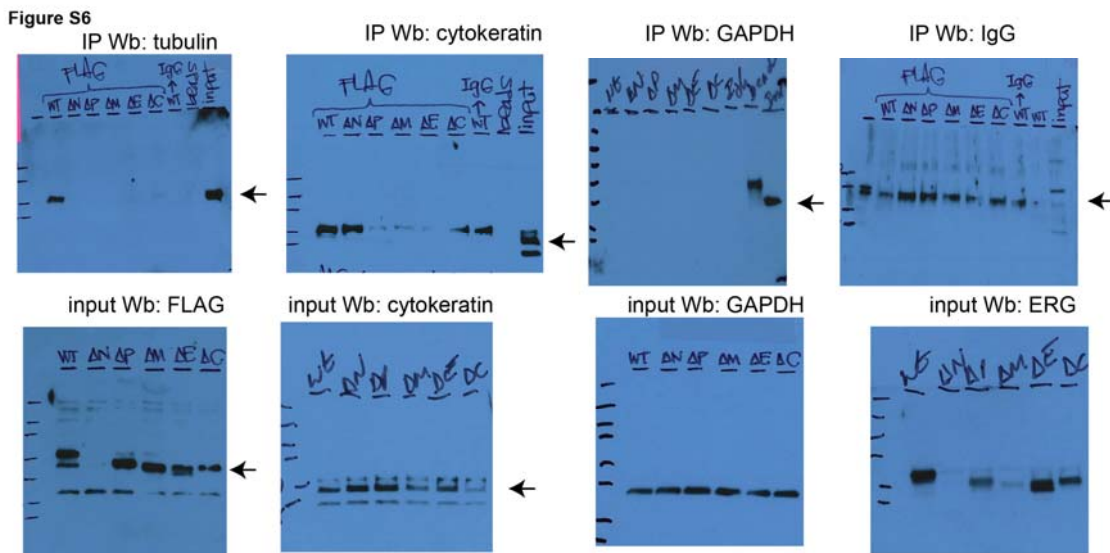

**Supplementary Figure 11. Western blots of the cropped images throughout the text for the indicated figure. Arrow indicates the protein in question.**

Figure 5a

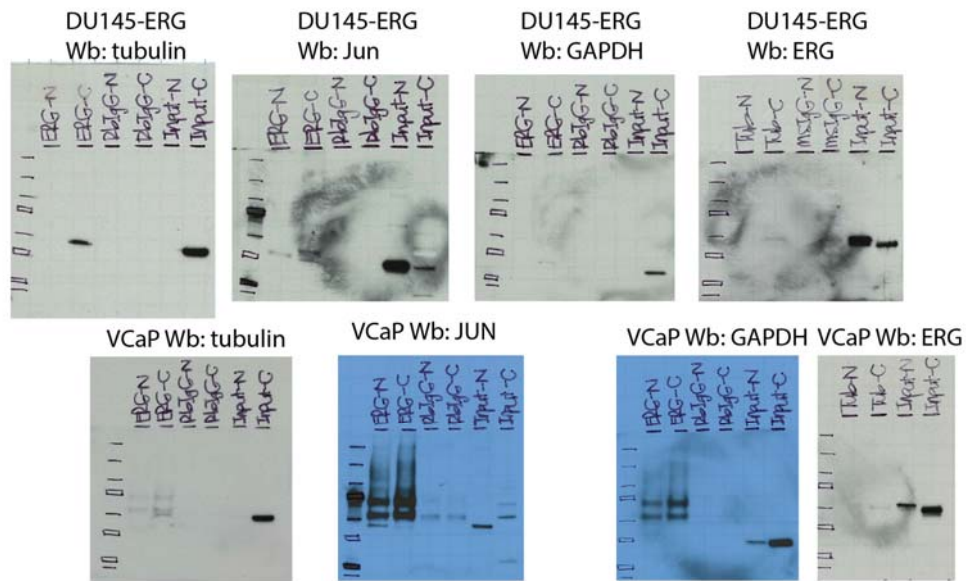

Figure 5c

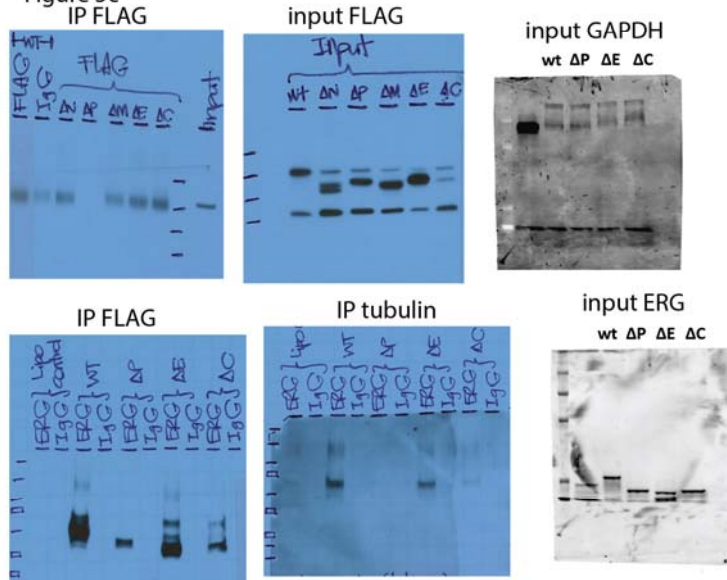

Figure 5d

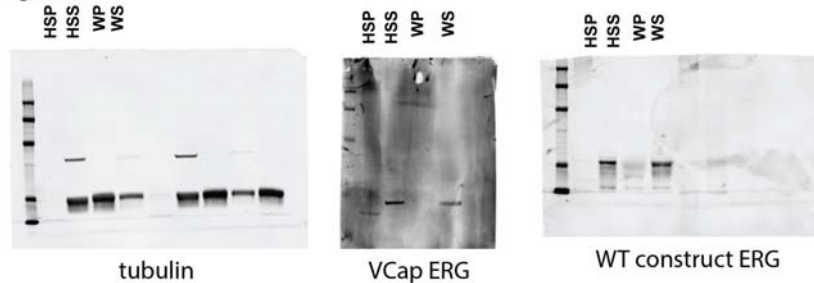

Supplementary Figure 12. Western blots of the cropped images throughout the text for the indicated figure.

| Parameter\conditions                                 | DU145-GFP        | DU145-GFP<br>1nM DTX | Statistical<br>significance | DU145-ERG        | DU145-ERG<br>1nM DTX | Statistical<br>significance |
|------------------------------------------------------|------------------|----------------------|-----------------------------|------------------|----------------------|-----------------------------|
| movies (#)                                           | 12               | 10                   |                             | 15               | 14                   |                             |
| growth track speed ( $\mu\text{m min}^{-1}$ )        | 11.46 $\pm$ 1.88 | 8.14 $\pm$ 1.02      | *                           | 9.58 $\pm$ 1.04  | 10.26 $\pm$ 1.53     | n.s.                        |
| gap/pause speed ( $\mu\text{m min}^{-1}$ )           | 5.07 $\pm$ 0.97  | 3.22 $\pm$ 0.41      | *                           | 3.85 $\pm$ 0.69  | 4.45 $\pm$ 0.81      | n.s.                        |
| Growth Times (s)                                     | 8.03 $\pm$ 0.74  | 7.87 $\pm$ 0.93      | n.s.                        | 6.83 $\pm$ 0.94  | 8.41 $\pm$ 0.67      | *                           |
| Gap/pause Times (s)                                  | 10.84 $\pm$ 0.79 | 11.12 $\pm$ 0.93     | n.s.                        | 10.93 $\pm$ 1.04 | 10.88 $\pm$ 0.57     | n.s.                        |
| growth segment speed ( $\mu\text{m min}^{-1}$ )      | 7.64 $\pm$ 1.35  | 5.32 $\pm$ 0.71      | *                           | 6.32 $\pm$ 0.99  | 6.84 $\pm$ 0.96      | n.s.                        |
| gaps per segment                                     | 1.32 $\pm$ 0.11  | 1.35 $\pm$ 0.04      | n.s.                        | 1.33 $\pm$ 0.008 | 1.37 $\pm$ 0.085     | n.s.                        |
| time ratio ( $T_{\text{gap}} / T_{\text{segment}}$ ) | 0.39 $\pm$ 0.038 | 0.42 $\pm$ 0.042     | n.s.                        | 0.43 $\pm$ 0.04  | 0.40 $\pm$ 0.02      | *                           |
| $\Delta T_{\text{segment}}$ (s)                      | 32.31 $\pm$ 2.50 | 32.42 $\pm$ 1.36     | n.s.                        | 30.29 $\pm$ 1.98 | 34.17 $\pm$ 2.64     | *                           |
| shrinkage speed ( $\mu\text{m min}^{-1}$ )           | 8.79 $\pm$ 1.86  | 4.81 $\pm$ 1.01      | *                           | 7.02 $\pm$ 1.00  | 7.86 $\pm$ 1.58      | n.s.                        |
| $\Delta t_{\text{shrink}}$ (s)                       | 15.69 $\pm$ 0.70 | 15.71 $\pm$ 1.00     | n.s.                        | 16.18 $\pm$ 0.98 | 16.74 $\pm$ 1.08     | n.s.                        |
| $P_{\text{shrink}}$ (%)                              | 0.29 $\pm$ 0.043 | 0.25 $\pm$ 0.044     | n.s.                        | 0.19 $\pm$ 0.004 | 0.26 $\pm$ 0.06      | n.s.                        |
| $T_{\text{shrink}}$ (%)                              | 0.21 $\pm$ 0.036 | 0.18 $\pm$ 0.035     | *                           | 0.16 $\pm$ 0.005 | 0.21 $\pm$ 0.05      | n.s.                        |

**Supplementary Table 1.** Microtubule dynamics parameters. Results of grouping of visible growth tracks of DU145 ERG+ or ERG- cells in comparing vehicle versus taxane per cell condition. Per condition: number of movies, growth track speeds  $\pm$  std, gap/pause speeds  $\pm$  std, growth track time, gap/pause time growth segment speeds  $\pm$  std, number of gaps/pauses per growth segment, percentage of time spent in gap/pause within a growth segment, growth segment time, shortening speeds  $\pm$  std, shortening time, probability of catastrophe at the end of grouped growth track, percentage of time spent in shortening within a multi-track trajectory.

| Parameter\conditions                            | DU145-GFP<br>veh | DU145-ERG<br>veh | Stat.<br>sig. |
|-------------------------------------------------|------------------|------------------|---------------|
| movies (#)                                      | 12               | 15               |               |
| growth track speed ( $\mu\text{m min}^{-1}$ )   | 11.46 $\pm$ 1.88 | 9.58 $\pm$ 1.04  | n.s.          |
| gap/pause speed ( $\mu\text{m min}^{-1}$ )      | 5.07 $\pm$ 0.97  | 3.85 $\pm$ 0.69  | *             |
| Growth Times (s)                                | 8.03 $\pm$ 0.74  | 6.83 $\pm$ 0.94  | *             |
| Gap/pause Times (s)                             | 10.84 $\pm$ 0.79 | 10.93 $\pm$ 1.04 | n.s.          |
| growth segment speed ( $\mu\text{m min}^{-1}$ ) | 7.64 $\pm$ 1.35  | 6.32 $\pm$ 0.99  | n.s.          |
| gaps per segment                                | 1.32 $\pm$ 0.11  | 1.33 $\pm$ 0.008 | n.s.          |
| time ratio Tgap / Tsegment                      | 0.39 $\pm$ 0.038 | 0.43 $\pm$ 0.04  | n.s.          |
| dT segment (s)                                  | 32.31 $\pm$ 2.50 | 30.29 $\pm$ 1.98 | *             |
| shrinkage speed (mm min <sup>-1</sup> )         | 8.79 $\pm$ 1.86  | 7.02 $\pm$ 1.00  | n.s.          |
| Dt shrink (s)                                   | 15.69 $\pm$ 0.70 | 16.18 $\pm$ 0.98 | n.s.          |
| Pshrink (%)                                     | 0.29 $\pm$ 0.043 | 0.19 $\pm$ 0.004 | n.s.          |
| Tshrink (%)                                     | 0.21 $\pm$ 0.036 | 0.16 $\pm$ 0.005 | n.s.          |

**Supplementary Table. 2** Results of grouping of visible growth tracks in vehicle treated DU145 ERG+ or ERG- cells.

| Patient Number | ERG IHC staining | % nuclei ERG-positive | Intensity nuclei positive | Intensity Cytoplasmic positive | TMPRSS-ERG FISH | Type of tissue | PCWG2 PSA progression <sup>2,4</sup> | Baseline PSA | PSA at 12 weeks | PSA at 15 weeks | PSA at >15 weeks | Greatest percentage change in PSA over course of |
|----------------|------------------|-----------------------|---------------------------|--------------------------------|-----------------|----------------|--------------------------------------|--------------|-----------------|-----------------|------------------|--------------------------------------------------|
| 1              | Negative         |                       |                           |                                | Negative        | TRB            | Yes                                  | 4            | 16.2            | 19.2            |                  | 380                                              |
| 2              | Positive         | 60%                   | 3+                        | 1+                             | N/A             | TRB            | Yes                                  | 260          | 640             | 661             |                  | 154                                              |
| 3              | Negative         |                       |                           |                                | Negative        | TRB            | Yes                                  | 10.5         | 18.7            | 17.7            |                  | 78                                               |
| 4              | Negative         |                       |                           |                                | Negative        | TRB            | Yes                                  | 7.65         | 12.7            |                 | Died             | 66                                               |
| 5              | Negative         |                       |                           |                                | Negative        | RP             | Yes                                  | 58.1         | 83.4            | 79.2            |                  | 43                                               |
| 6              | Positive         | 95%                   | 3+                        | 1+                             | Positive        | TRB            | Yes                                  | 65           | 88.2            | 91.3            |                  | 69                                               |
| 7              | Negative         | N/A                   | N/A                       | N/A                            | Positive        | CELL BLOCK     | Yes                                  | 67.6         | 88              | N/A             | 130              | 92                                               |
| 8              | Positive         | 95%                   | 3+                        | 1+                             | Positive        | TRB            | Yes                                  | 951          | 1193            | 1338            |                  | 41                                               |
| 9              | Positive         | 95%                   | 3+                        | 1+                             | Positive        | TRB            | Yes                                  | 416.3        | 489.5           | 926             |                  | 122                                              |
| 10             | Negative         |                       |                           |                                | Negative        | TRB            | No                                   | 175          | 202             | 184             |                  | 15                                               |
| 11             | Negative         |                       |                           |                                | Negative        | TURP           | No                                   | 216          | 189             | 232             |                  | 85                                               |
| 12             | Negative         |                       |                           |                                | Negative        | TRB            | No                                   | 76.7         | 44.5            | 31.7            |                  | -59                                              |
| 13             | Negative         |                       |                           |                                | N/A             | Bone           | No                                   | 342          | 194             | 282             |                  | -59                                              |
| 14             | Positive         | 95%                   | 2+                        | 1+                             | Positive        | TRB            | No                                   | 4984         | 1918            | 2295            |                  | -62                                              |
| 15             | Negative         |                       |                           |                                | Negative        | TURP           | No                                   | 914.9        | 474.7           | 475.9           |                  | -58                                              |
| 16             | Negative         |                       |                           |                                | Negative        | TRB            | No                                   | 376          | 193             | 226             |                  | -49                                              |
| 17             | Negative         |                       |                           |                                | Negative        | TRB            | No                                   | 223.2        | 92.54           | 63.46           |                  | -84                                              |
| 18             | Positive         | 95%                   | 3+                        | 1+                             | Positive        | TRB            | No                                   | 95.7         | 30.2            | 39              |                  | -75                                              |
| 19             | Negative         |                       |                           |                                | N/A             | TRB            | No                                   | 10054        | 4264            | 3676            |                  | -64                                              |
| 20             | Negative         |                       |                           |                                | Negative        | TRB            | No                                   | 38.14        | 12.86           | 7.21            |                  | -89                                              |
| 21             | Negative         |                       |                           |                                | Negative        | RP             | No                                   | 94.6         | 27.6            | 22.35           |                  | -77                                              |
| 22             | Positive         | 95%                   | 3+                        | 1+                             | Positive        | TRB            | No                                   | 1376         | 375             | 330             |                  | -79                                              |
| 23             | Negative         |                       |                           |                                | Negative        | RP             | No                                   | 154          | 41.7            | 29.5            |                  | -87                                              |
| 24             | Positive         | 95%                   | 3+                        | 1+                             | Positive        | TRB            | No                                   | 105          | 27.8            | N/A             | 37.9             | -74                                              |
| 25             | Negative         |                       |                           |                                | Negative        | TRB            | No                                   | 35.69        | 9.02            | 7.92            |                  | -80                                              |
| 26             | Negative         |                       |                           |                                | Negative        | TRB            | No                                   | 2286         | 93.36           | 77.69           |                  | -97                                              |
| 27             | Negative         |                       |                           |                                | N/A             | RP             | No                                   | 141          | 6.87            | 2.26            |                  | -99                                              |
| 28             | Negative         |                       |                           |                                | Negative        | CELL BLOCK     | No                                   | 202.8        | 4.38            | 4.13            |                  | -98                                              |
| 29             | Positive         | 90%                   | 2+                        | 0+                             |                 | RP             | No                                   | 4.33         | 1.55            |                 | 0.78             | -82                                              |
| 30             | Negative         |                       |                           |                                | N/A             | TRB            | Yes                                  | 49           | 56.69           | 53.18           | 43.14            | -12                                              |
| 31             | Positive         | 100%                  | 3+                        | 0+                             |                 | TRB            | Yes                                  | 126          | 145.6           | 149.21          | 115.4            | -8                                               |
| 32             | Negative         |                       |                           |                                |                 |                | No                                   | 98.98        | 65.3            |                 | 54.13            | -45                                              |
| 22             | Negative         |                       |                           |                                |                 |                | No                                   | 170.55       | 32.41           |                 | 17.5             | -90                                              |
| 34             | Negative         |                       |                           |                                |                 |                | No                                   | 188.2        | 20.6            |                 | 20.6             | -89                                              |

**Supplementary Table 3:** ERG/TMPRSS-ERG expression in men with metastatic castrate resistant prostate cancer treated with docetaxel.

Abbreviations: IHC = immunohistochemistry, FISH = fluorescent in situ hybridization, PCWG = Prostate Cancer Working Group, PR = partial response, SD = stable disease, PD = progressive disease, TRB = transrectal biopsy, RP = radical prostatectomy, TURP = trans-urethral resection of prostate, N/A = not available

## References

- 1 Rickman, D. S. *et al.* Oncogene-mediated alterations in chromatin conformation. *Proc Natl Acad Sci U S A* **109**, 9083-9088, doi:1112570109 [pii] 10.1073/pnas.1112570109 (2012).
